# Supplementary material for: ATP-responsive near-infrared fluorescent nanoparticles for synergistic chemotherapy and starvation therapy
Source: Royal Society of Chemistry journal article supplement (doi:10.1039/d1nr07233a), 2022-01-01
Supplement: d1nr07233a1.pdf [file d1nr07233a1.pdf]

## Electronic Supplementary Information

### ATP-responsive Near-Infrared Fluorescence Nanoparticles for Synergistic Chemotherapy and Starvation Therapy

Xi-Xi Chen,<sup>a</sup> Mei-Jia Hou,<sup>a</sup> Wen-Xin Wang,<sup>a</sup> Min Tan,<sup>a</sup> Zhi-Ke Tan,<sup>a</sup> Guo-Jiang Mao,<sup>b</sup>  
Bin Yang,<sup>a</sup> Yongfei Li <sup>\*,ac</sup> Chun-Yan Li<sup>\*,a</sup>

<sup>a</sup> Key Laboratory for Green Organic Synthesis and Application of Hunan Province, Key Laboratory of Environmentally Friendly Chemistry and Applications of Ministry of Education, College of Chemistry, Xiangtan University, Xiangtan, 411105, PR China.

<sup>b</sup> Henan Key Laboratory of Organic Functional Molecule and Drug Innovation, Collaborative Innovation Center of Henan Province for Green Manufacturing of Fine Chemicals, Key Laboratory of Green Chemical Media and Reactions, Ministry of Education, School of Chemistry and Chemical Engineering, Henan Normal University, Xinxiang, 453007, PR China.

<sup>c</sup> College of Chemical Engineering, Xiangtan University, Xiangtan, 411105, PR China.

\*Corresponding Author. E-mail: lichunyan79@sina.com (Chun-Yan Li); liyongfei@xtu.edu.cn  
(Yongfei Li)

## Table of contents

|           |      |
|-----------|------|
| Synthesis | S-3  |
| Fig. S1   | S-4  |
| Fig. S2   | S-5  |
| Fig. S3   | S-5  |
| Fig. S4   | S-6  |
| Fig. S5   | S-6  |
| Fig. S6   | S-7  |
| Fig. S7   | S-7  |
| Fig. S8   | S-8  |
| Fig. S9   | S-8  |
| Fig. S10  | S-9  |
| Fig. S11  | S-9  |
| Fig. S12  | S-10 |
| Fig. S13  | S-10 |
| Fig. S14  | S-11 |
| Fig. S15  | S-12 |

**Synthesis of Compound RhI.** RhI was conveniently synthesized by two steps according to the synthetic route depicted in Fig. S1.

**Compound Rh.** Cyclohexanone (12.8 mmol, 1.32 mL) was added dropwise to concentrated H<sub>2</sub>SO<sub>4</sub> (20.0 mL) and cooled down to 0 °C. Then, 2-(4-diethylamino-2-hydroxybenzoyl) benzoic acid (6.4 mmol, 2.00 g) was added under stirring. The reaction mixture was heated at 90 °C for 1.5 h. The obtained solution was quickly poured onto ice and 2 mL of HClO<sub>4</sub> were added. After vacuum filtration and washing with cold water, an orange solid product was obtained. Yield: 2.7 g (91%). <sup>1</sup>H NMR (400 MHz, DMSO-d<sub>6</sub>) δ 8.13 (d, J = 8.0 Hz, 1H), 7.79 (t, J = 7.6 Hz, 1H), 7.70 (t, J = 7.6 Hz, 1H), 7.25 (d, J = 7.6 Hz, 2H), 7.02-6.96 (m, 2H), 3.58-3.53 (m, 4H), 3.00 (s, 2H), 2.03 (t, J = 5.6 Hz, 2H), 1.80 (s, 2H), 1.65-1.57 (m, 2H), 1.24 (t, J = 6.8 Hz, 6H). MS (TOF, m/z) calcd: 376.2, found: 376.3.

**Compound RhI.** Compound Rh (0.28 g, 0.6 mmol), 1,3,3-trimethyl-2-(formyl methylene) indoline (0.11 g, 0.5 mmol) were dissolved in anhydrous acetic acid (8 mL). The mixture was stirred at 50 °C for 1.5 h. Then, 8 mL water was added to quench the reaction. After the removal of solvent under reduced pressure, the resulted residue was subjected to silica gel column chromatography for purification with CH<sub>2</sub>Cl<sub>2</sub>/CH<sub>3</sub>CH<sub>2</sub>OH (20:1) as the eluent to afford a dark-green solid product. Yield: 0.09 g (26%). <sup>1</sup>H NMR (400 MHz, DMSO-d<sub>6</sub>) δ 8.48 (d, J = 14.4 Hz, 1H), 8.11 (d, J = 7.6 Hz, 1H), 7.77-7.73 (m, 1H), 7.63 (t, J = 6.4 Hz, 2H), 7.42 (d, J = 4 Hz, 2H), 7.26 (d, J = 7.2 Hz, 2H), 6.79-6.74 (m, 1H), 6.66 (s, 1H), 6.19 (d, J = 14.4 Hz, 1H), 4.20 (t, J = 6.4 Hz, 1H), 3.67 (s, 3H), 3.14 (q, J = 7.6 Hz, 16.4 Hz, 4H), 2.62 (t, J = 6.5 Hz, 4H), 1.76-1.69 (m, 8H), 1.14 (t, J = 6.8 Hz, 6H). MS (TOF, m/z) calcd2: 559.3, found: 559.3. Elem. Anal. (%) calcd for C<sub>37</sub>H<sub>39</sub>ClN<sub>2</sub>O<sub>7</sub>: C, 67.42; H, 5.76; N, 4.25. Found: C, 67.44; H, 5.75; N, 4.26.

**Synthesis of ZIF-90 Nanoparticles.** A DMF solution (2 mL) of zinc acetate dihydrate (0.2 M) was poured into a DMF solution (2 mL) of 2-ICA (0.4 M) under vigorous stirring at room temperature. After 5 min, DMF (6 mL) was added into the reaction mixture to

stabilize the ZIF-90 nanoparticles. The resulting ZIF-90 nanoparticles were then purified by centrifugation (10 000 rpm, 5 min) and washed with DMF once and ethanol in turn for several times. ZIF-90 nanoparticles were then collected and dried under vacuum at room temperature for 24 h.

**Synthesis of RhI@ZIF-90 Nanoparticles.** A DMF solution (2 mL) of zinc acetate dihydrate (0.2 M) was poured into a DMF solution (2 mL) of 2-ICA (0.4 M) containing RhI (2 mg) under vigorous stirring at room temperature. After 5 min, DMF (6 mL) was added into the reaction mixture to stabilize the spheres. The resulting nanoparticles were then purified by centrifugation (10 000 rpm, 5 min) and washed with DMF once and ethanol in turn for several times. The nanoparticles were then collected and dried under vacuum at room temperature for 24 h.

**Synthesis of RhI-DOX@ZIF-90 Nanoparticles.** A DMF solution (2 mL) of zinc acetate dihydrate (0.2 M) was poured into a DMF solution (2 mL) of 2-ICA (0.4 M) containing DOX (2 mg) and RhI (2 mg) under vigorous stirring at room temperature. After 5 minutes, DMF (6 mL) was added into the reaction mixture to stabilize the spheres. The resulting nanoparticles were then purified by centrifugation (10 000 rpm, 5 min) and washed with DMF once and ethanol in turn for several times. The nanoparticles were then collected and dried under vacuum at room temperature for 24 h.

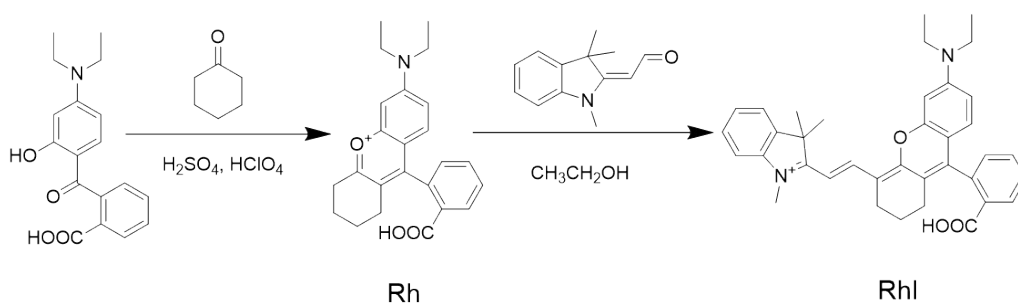

**Fig. S1** Synthetic route for RhI.

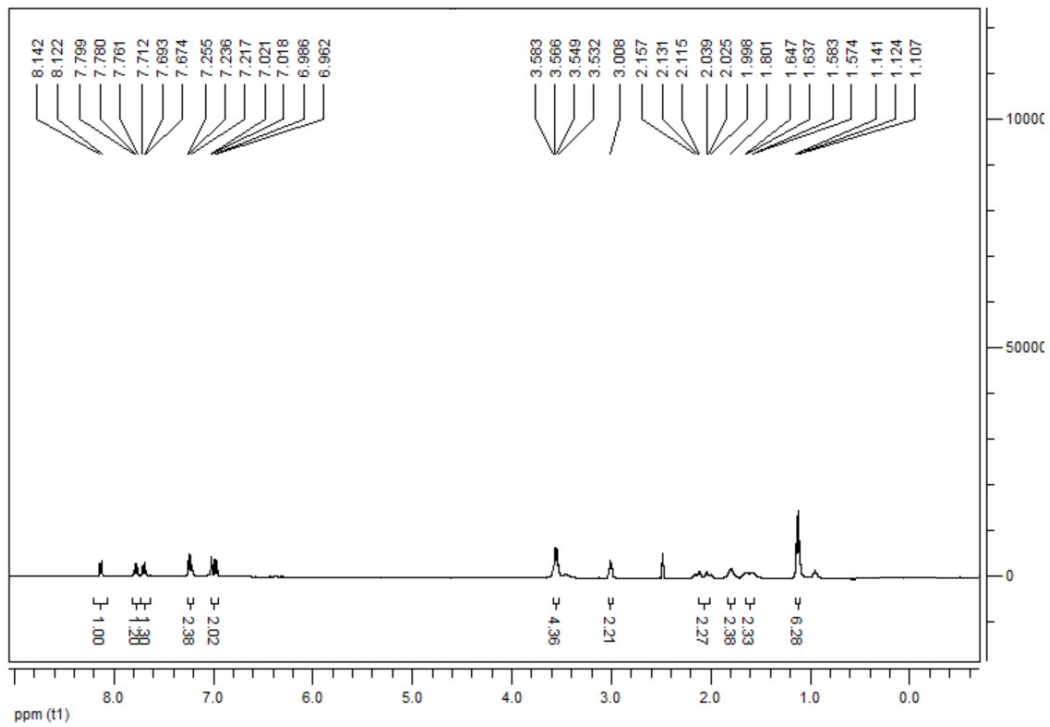

**Fig. S2**  $^1\text{H}$  NMR spectra of compound Rh in  $\text{DMSO-d}_6$ .

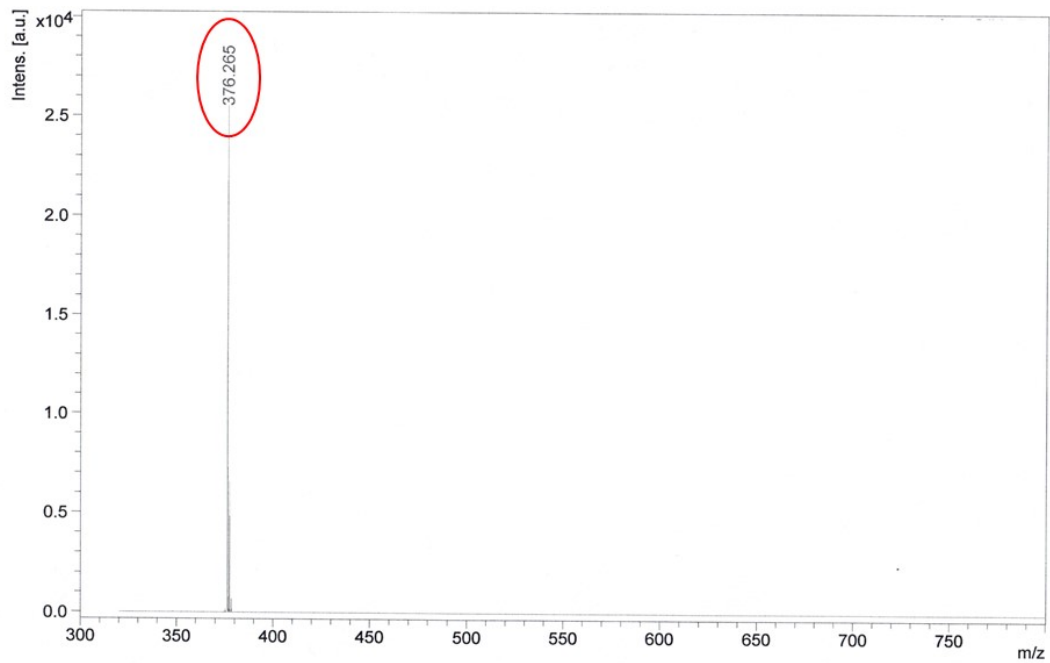

**Fig. S3** Mass spectra of compound Rh.

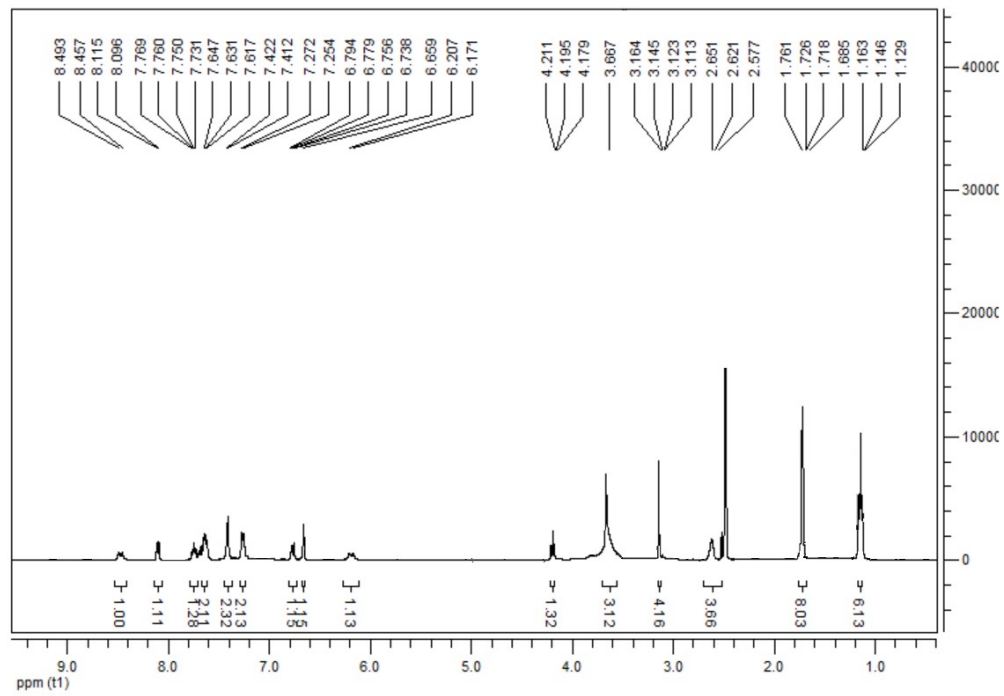

Fig. S4  $^1\text{H}$  NMR spectra of compound RhI in DMSO- $\text{d}_6$ .

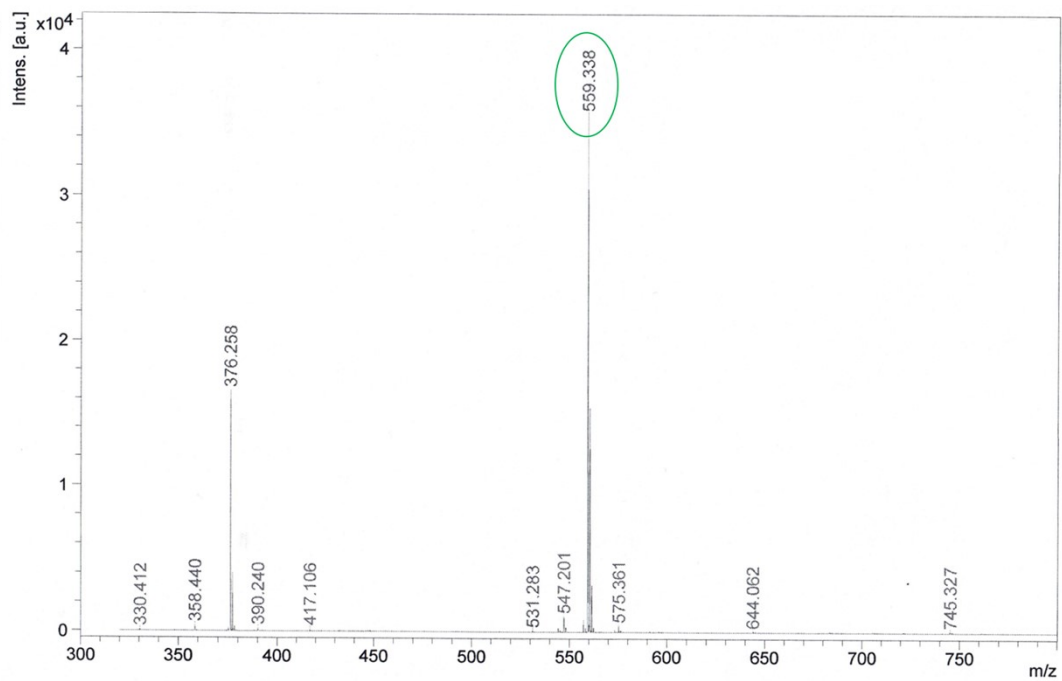

Fig. S5 Mass spectra of compound RhI.

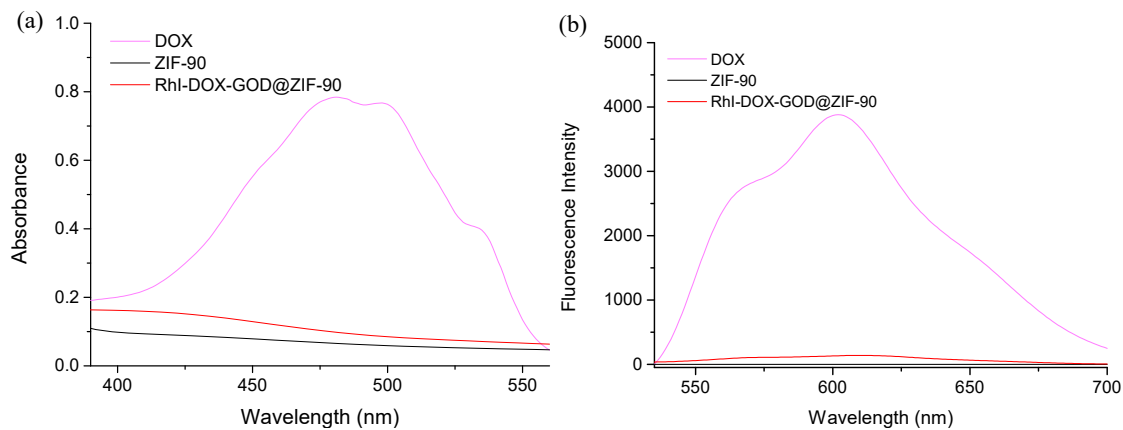

**Fig. S6** (a) Absorption spectra and (b) fluorescence spectra of of DOX, ZIF-90 and RhI-DOX-GOD@ZIF-90.  $\lambda_{ex} = 480$  nm.

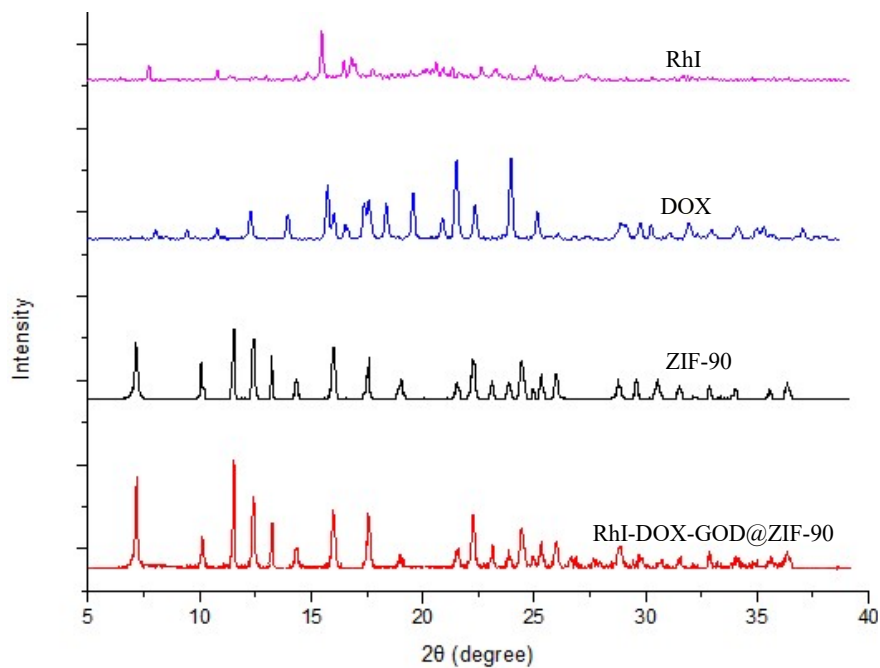

**Fig. S7** PXRD patterns of RhI, DOX, ZIF-90, and RhI-DOX-GOD@ZIF-90.

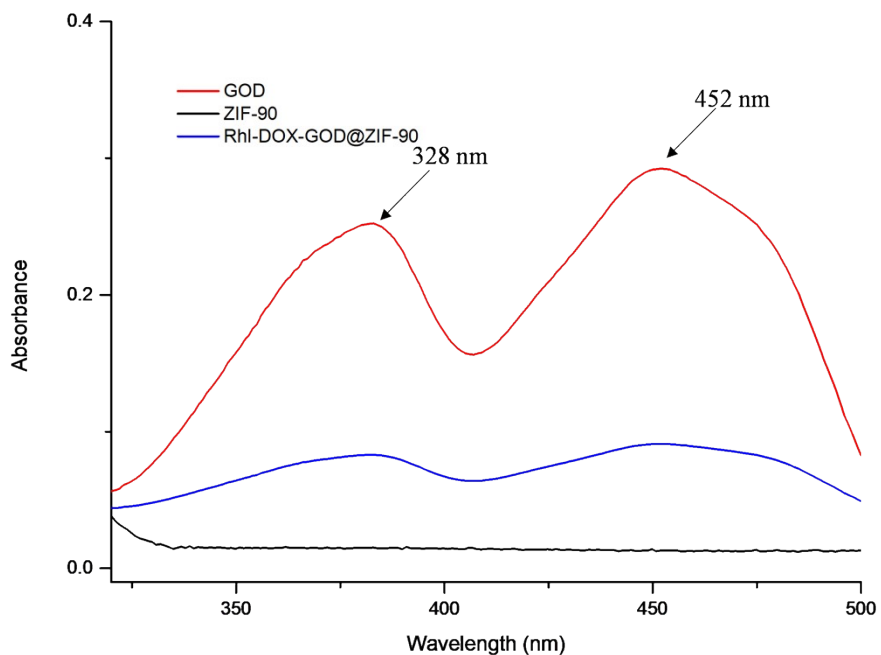

**Fig. S8** Absorption spectra of GOD, ZIF-90 and RhI-DOX-GOD@ZIF-90.

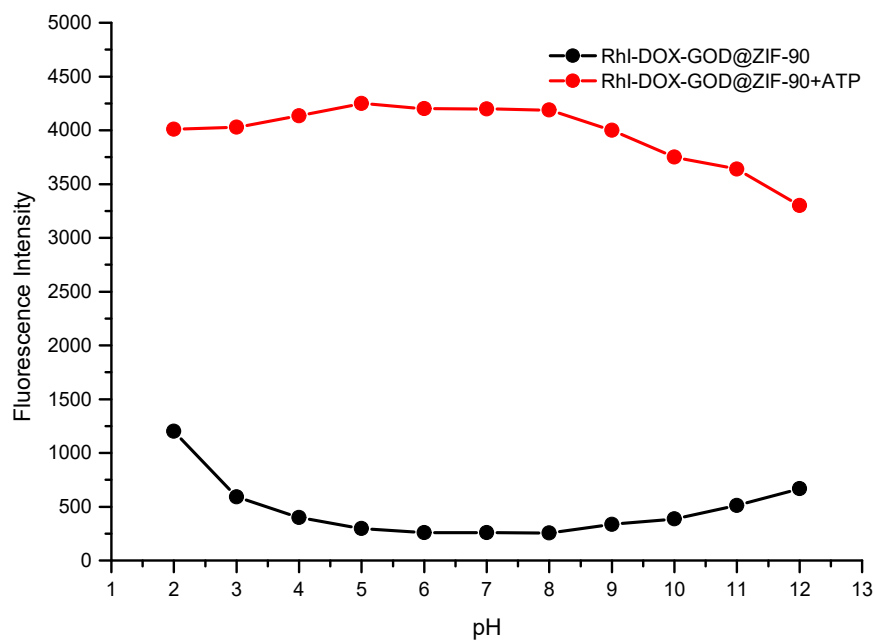

**Fig. S9** Effect of pH on the fluorescence of RhI-DOX-GOD@ZIF-90 nanoparticles (4 mg/mL) before and after reaction with ATP (10 mM).  $\lambda_{ex}/\lambda_{em} = 690/750$  nm.



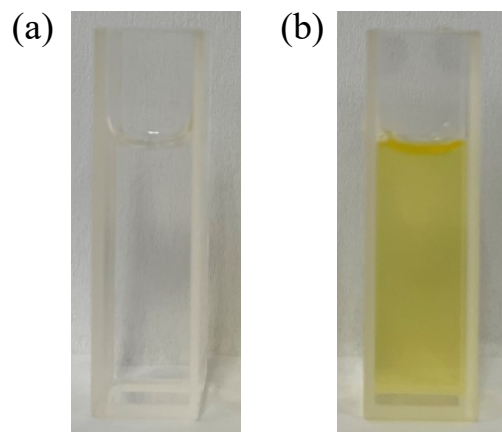

**Fig. S10** Catalytic activity of RhI-DOX-GOD@ZIF-90 (4 mg/mL) upon the addition of ATP (10 mM) before (a) and after (b) the reaction with D-glucose (2 mg/mL) by colorimetric assay. A yellow color was produced of  $\text{H}_2\text{O}_2$  in the sample.

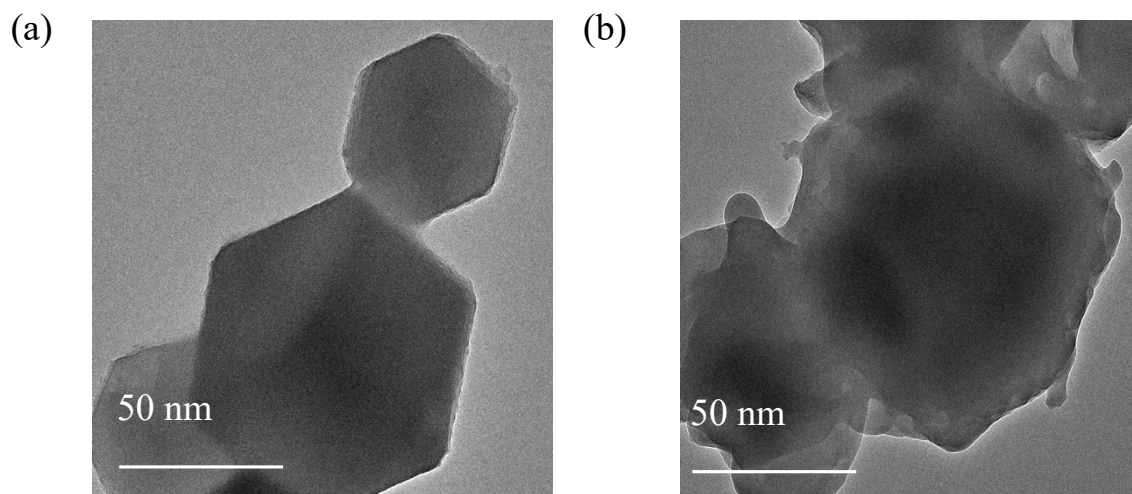

**Fig. S11** TEM images of (a) RhI-DOX-GOD@ZIF-90 nanoparticles and (b) RhI-DOX-GOD@ZIF-90 nanoparticles reacting with ATP.

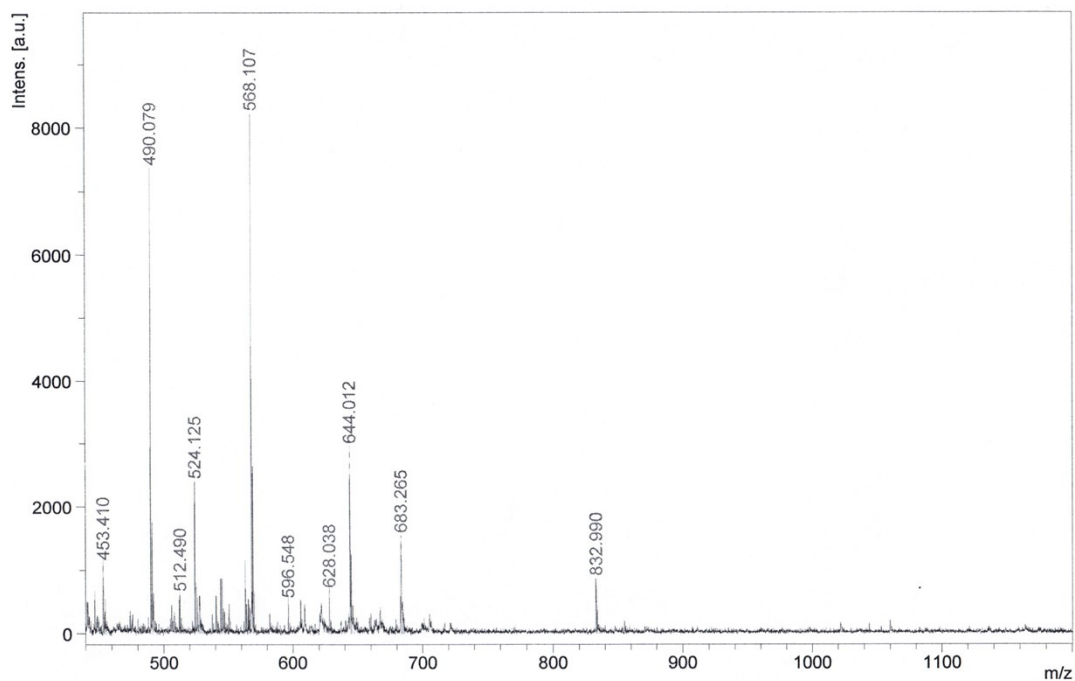

**Fig. S12** Mass spectra of RhI-DOX-GOD@ZIF-90 nanoparticles.

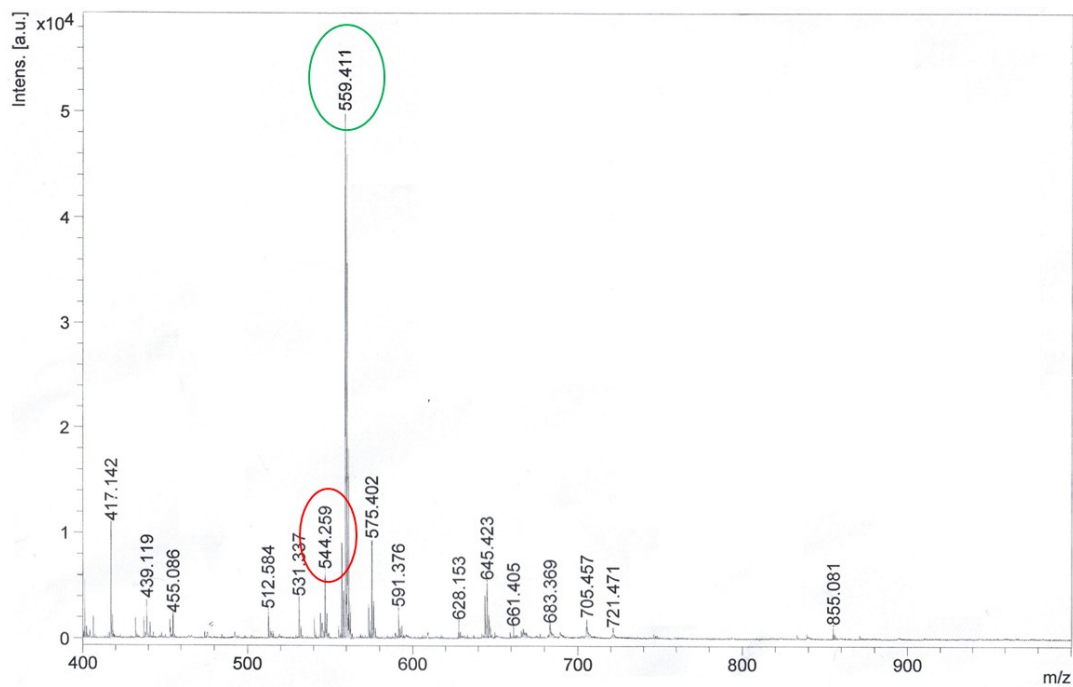

**Fig. S13** Mass spectra of RhI-DOX-GOD@ZIF-90 nanoparticles reacted with ATP.

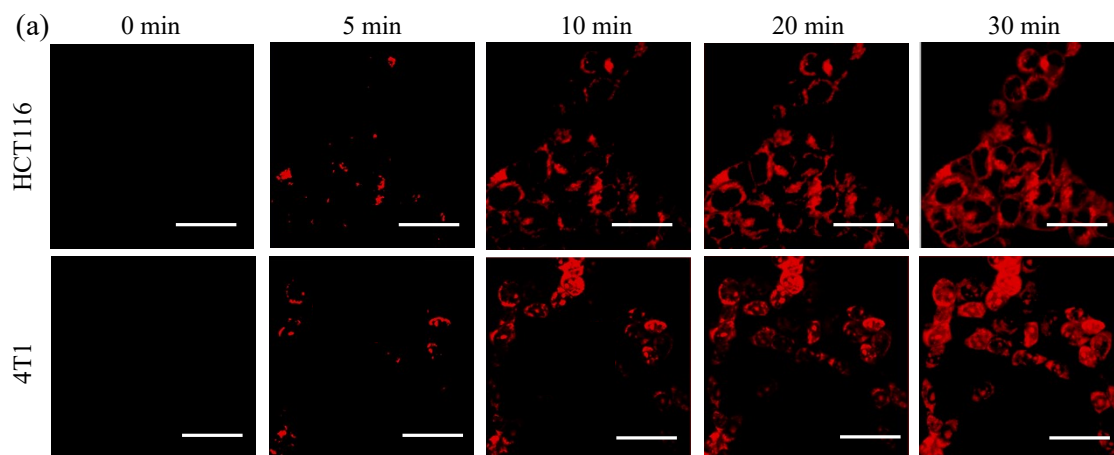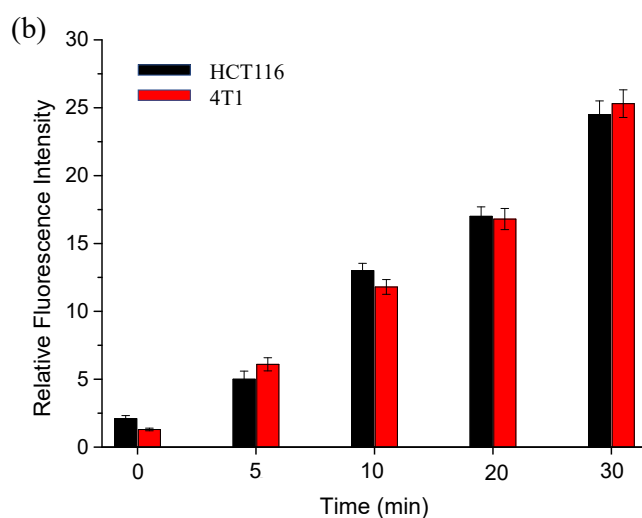

**Fig. S14** (a) The time-dependent fluorescence imaging of HCT116 and 4T1 cells treated with RhI-DOX-GOD@ZIF-90 nanoparticles (4 mg/mL). (b) Relative fluorescence intensity.  $\lambda_{\text{ex}} = 640 \text{ nm}$ ,  $\lambda_{\text{em}} = 660\text{-}740 \text{ nm}$ . Scale bar: 50  $\mu\text{m}$ .

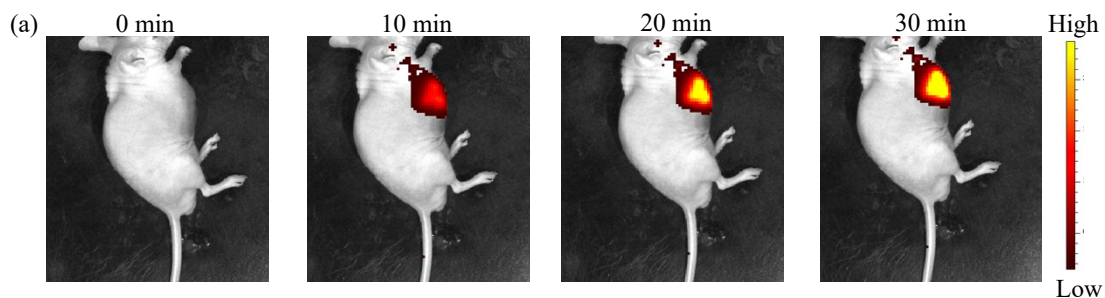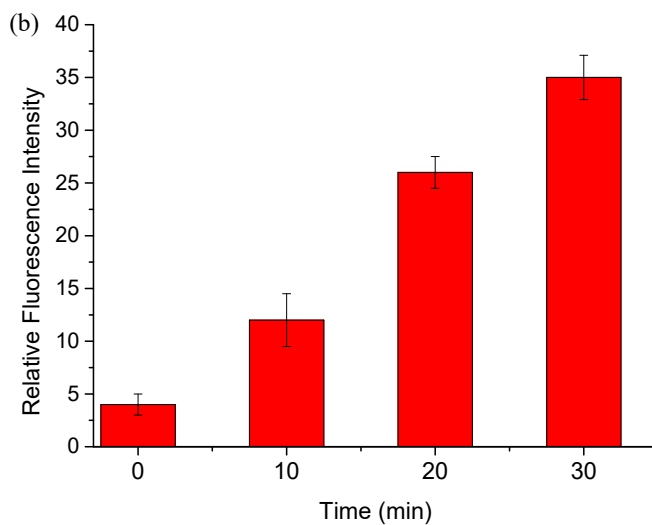

**Fig. S15** (a) The time-dependent fluorescence imaging in tumor-bearing mice with intravenous injection of RhI-DOX-GOD@-ZIF-90 nanoparticles (4 mg/mL, 10  $\mu$ L). (b) Relative fluorescence intensity.  $\lambda_{\text{ex}} = 640 \text{ nm}$ ,  $\lambda_{\text{em}} = 660\text{-}760 \text{ nm}$
